# Supplementary material for: IVT cell-free biosensors for tetracycline and macrolide detection based on allosteric transcription factors (aTFs)
Source: Royal Society of Chemistry journal article supplement (doi:10.1039/d2ay01316a), 2022-01-01
Supplement: d2ay01316a1.pdf [file d2ay01316a1.pdf]

1           **IVT cell-free biosensors for tetracyclines and macrolides detection based on**  
2                           **allosteric transcription factors (aTFs)**

3  
4   Huaixiu Bi<sup>a,b,#</sup>, Chen Zhao<sup>b, #</sup>, Yongkang Zhang<sup>b</sup>, Xi Zhang<sup>b</sup>, Bin Xue<sup>b</sup>, Chenyu Li<sup>b</sup>,  
5   Shang Wang<sup>b</sup>, Xiaobo Yang<sup>b</sup>, Chao Li<sup>b</sup>, Zhigang Qiu<sup>b</sup>, Jingfeng Wang<sup>b,\*</sup>, Zhiqiang  
6   Shen<sup>a,b,\*</sup>

7  
8   <sup>a</sup> College of Food Science and Technology, Shanghai Ocean University, Shanghai  
9   201306, China

10  
11   <sup>b</sup> Department of hygienic toxicology and environmental hygiene, Tianjin Institute of  
12   Environmental and Operational Medicine, Tianjin 300050, China

13  
14   \* Corresponding authors.

15   E-mail addresses: jingfengwang@hotmail.com; tianjinszq922@sohu.com

16

17   # These authors contributed equally to this work.

18

- 19 **Table S1. DNA Sequences**
- 20 **Table S2. Preparations of 6.5% nondenaturing polyacrylamide gel**
- 21 **Table S3. Chemical components and concentration of NASBA**
- 22 **Table S4. Consistency and stability of the aTFs-based biosensors**
- 23 **Figure S1. Effect of pH on IVT cell-free biosensor**
- 24 **Figure S2. Arbitrary fluorescence values were converted to micromolar**
- 25 **equivalent fluorescein**
- 26

**Table S1. DNA Sequences**

| <b>Label</b>      | <b>Sequence</b>                                                                                                                                                                                                                                                                       | <b>Purpose</b>                                 |
|-------------------|---------------------------------------------------------------------------------------------------------------------------------------------------------------------------------------------------------------------------------------------------------------------------------------|------------------------------------------------|
|                   |                                                                                                                                                                                                                                                                                       | DNA template                                   |
| F                 | gcggataacaatttcacacaggaacagc                                                                                                                                                                                                                                                          | amplification forward primer                   |
|                   |                                                                                                                                                                                                                                                                                       | DNA template                                   |
| R                 | caaaaaaccctcaagaccg                                                                                                                                                                                                                                                                   | amplification reverse primer                   |
|                   |                                                                                                                                                                                                                                                                                       | DNA template                                   |
| Biotin-F          | Biotin-<br>gcggataacaatttcacacaggaacagc                                                                                                                                                                                                                                               | amplification forward primer for BIAcore /EMSA |
|                   |                                                                                                                                                                                                                                                                                       | DNA template                                   |
| Biotin-R          | Biotin-caaaaaaccctcaagaccg                                                                                                                                                                                                                                                            | amplification reverse primer for EMSA/BIAcore  |
| Sense primers     | ttaagattatgctgagtgatatccccacatac<br>acatggcaaga                                                                                                                                                                                                                                       | For NASBA                                      |
| Antisense primers | cccacatactctgatgatcc                                                                                                                                                                                                                                                                  | For NASBA                                      |
| T7-tetO-3WJdB-T   | gcggataacaatttcacacaggaacagctat<br>gaccatgattacgccaagcttgcctgca<br>ggcgcactctagataatacgcactactatagga<br>ggtcctatcagtgatagagaccacatactct<br>gatgatccgagacggcgggtccagatattc<br>tatctgtcgagtagagtgtgggctcggatcatt<br>catggcaagagacggcgggtccagatattc<br>tatctgtcgagtagagtgtgggctcttccatgt | For tetracyclines detection                    |

gtatgtgggtagcataacccttggggcctcta  
 aacgggtcttgaggggtttttg  
 gcggataacaattcacacaggaacagctat  
 gaccatgattacgccaagcttgcacgctgca  
 ggctgactctagataatacactcactatagga  
 gggaatataaccgacgtgactgttacatttagg  
 T7-mphO- tggccacatactctgatgatccgagacgggc  
 3WJdB-T gggccagatattcgtatctgtcagtagagtg For macrolides detection  
 tgggctcggatcattcatggcaagagacgggc  
 gggccagatattcgtatctgtcagtagagtg  
 tgggctcttgccatgtgtatgtgggtagcataa  
 ccccttggggcctctaaacgggtcttgagggg  
 tttttg

28

29

30

31

32

**Table S2. Preparation of electrophoresis gel of EMSA**

| Reagent             | Stock Concentration | Volume |
|---------------------|---------------------|--------|
| TBE Buffer (10×)    | 45mM                | 1mL    |
| 30% Acr-Bis         | 0.5μM               | 2.2 mL |
| Glycerol            | 80% (v/w)           | 80μL   |
| Ammonium persulfate | 10% (v/w)           | 90μL   |
| TEMED               | 100 mM              | 10μL   |
| ddH <sub>2</sub> O  |                     | 6.62mL |

33

34

35

36

**Table S3. Chemical components and concentration of NASBA**

| Reagent                                              | Stock Concentration | Volume           |
|------------------------------------------------------|---------------------|------------------|
| IVT reaction solution                                | -                   | 20 $\mu$ L       |
| sense and antisense primers                          | 10 $\mu$ M          | 0.4 $\mu$ L      |
| RNase inhibit                                        | 40 (U/ $\mu$ l)     | 0.5 $\mu$ L      |
| NTPs                                                 | 100 mM              | Each 0.4 $\mu$ L |
| d NTPs Mix                                           | 10mM each           | 2 $\mu$ L        |
| 65 $^{\circ}$ C, 5 min, after 37 $^{\circ}$ C, 5 min |                     |                  |
| AMV                                                  | 10 U/ $\mu$ L       | 1 $\mu$ L        |
| RNase H                                              | 5 U/ $\mu$ L        | 0.1 $\mu$ L      |
| T7 RNAP                                              | 200 U/ $\mu$ L      | 0.25 $\mu$ L     |

37

38

39

40

41

42

**Table S4. Consistency and stability of the aTFs-based biosensors. (n=3)**

| Sample                      | Spiked ( $\mu$ M) | Batche 1         | Batche 2        | Batche 3        | Batche 4        | Batche 5        | RSD (%) |
|-----------------------------|-------------------|------------------|-----------------|-----------------|-----------------|-----------------|---------|
| <b>Anhydrotetracyclin</b>   | 1                 | 0.93 $\pm$ 0.05  | 1.04 $\pm$ 0.08 | 0.90 $\pm$ 0.03 | 0.95 $\pm$ 0.09 | 0.95 $\pm$ 0.09 | 5.60    |
| <b>e in milk</b>            | 5                 | 4.61 $\pm$ 0.31  | 4.51 $\pm$ 0.28 | 4.16 $\pm$ 0.39 | 4.37 $\pm$ 0.17 | 4.39 $\pm$ 0.22 | 3.84    |
| <b>Erythromycin in milk</b> | 10                | 8.10 $\pm$ 0.81  | 8.80 $\pm$ 0.92 | 9.17 $\pm$ 0.91 | 8.71 $\pm$ 0.71 | 8.85 $\pm$ 0.93 | 4.46    |
| <b>Erythromycin in milk</b> | 1                 | 0.92 $\pm$ 0.05  | 0.84 $\pm$ 0.06 | 0.86 $\pm$ 0.08 | 0.86 $\pm$ 0.06 | 0.82 $\pm$ 0.06 | 4.22    |
| <b>ycin in milk</b>         | 5                 | 4.93 $\pm$ 0.17  | 4.47 $\pm$ 0.17 | 4.37 $\pm$ 0.51 | 4.15 $\pm$ 0.15 | 4.32 $\pm$ 0.47 | 6.58    |
| <b>milk</b>                 | 10                | 10.07 $\pm$ 0.20 | 8.58 $\pm$ 0.49 | 8.89 $\pm$ 0.49 | 8.85 $\pm$ 0.36 | 8.76 $\pm$ 0.20 | 6.58    |

43 \*RSD (%) means relative standard deviation between 5 batches .

44

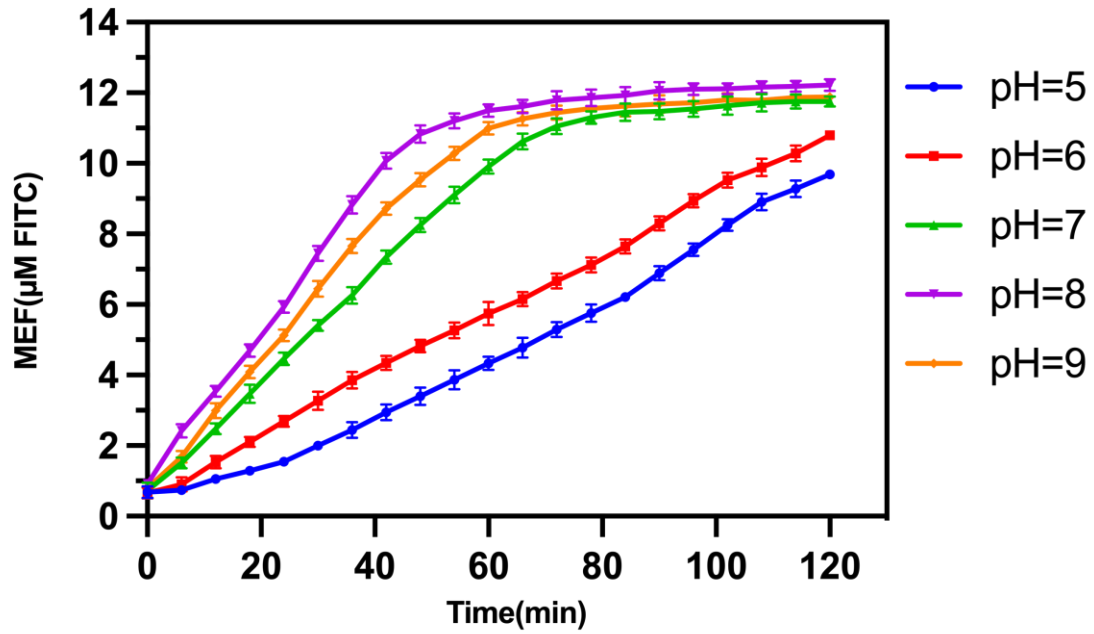

45

46 **Figure S1. Effect of pH on IVT cell-free biosensor.** MEF of biosensor at 120 min  
 47 under different pH of IVT without aTFs. Error bars are means and SDs from three  
 48 independent repeats.

(a)

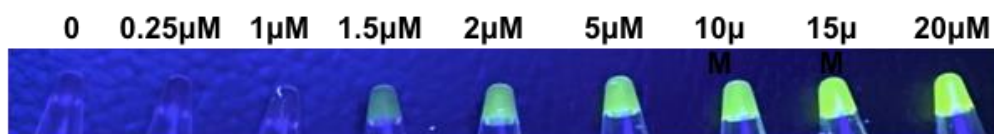

(b)

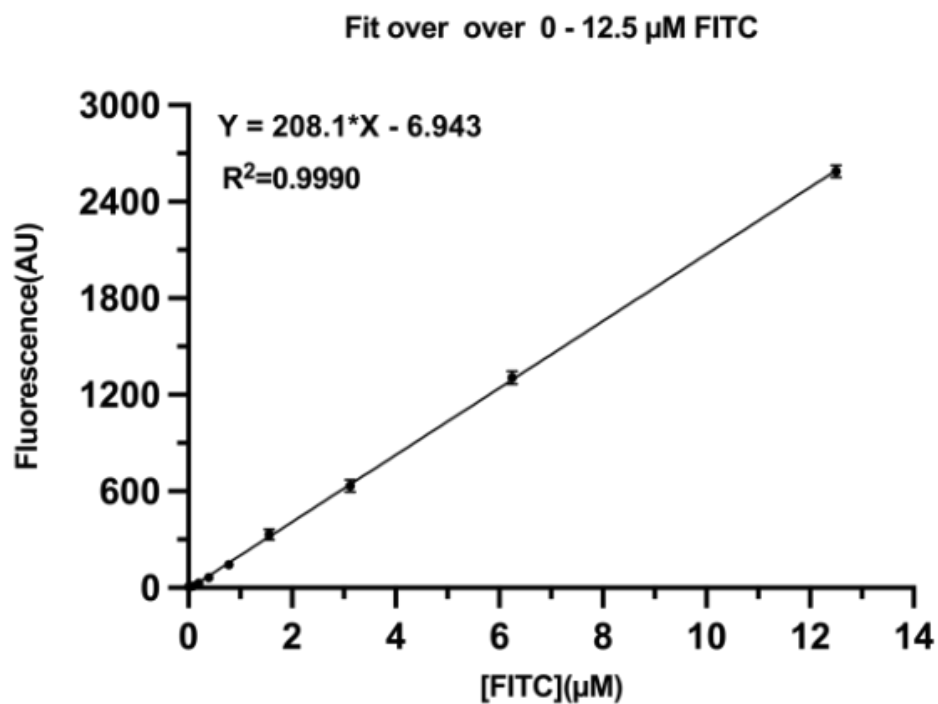

49

50 **Figure S2. Arbitrary fluorescence values were converted to micromolar**  
51 **equivalent fluorescein (MEF).** Fluorescence of different concentrations of FITC was  
52 measured at excitation and emission wavelengths of 472 and 507 nm by the plate  
53 reader. Error bars are SDs from nine independent repeats.
